# Supplementary material for: microRNA-374a suppresses colon cancer progression by directly reducing CCND1 to inactivate the PI3K/AKT pathway
Source: PubMed Central journal article supplement (PMC5173061; doi:10.18632/oncotarget.9320), 2016-05-12
Supplement: oncotarget-07-41306-s001.pdf [file oncotarget-07-41306-s001.pdf]

## microRNA-374a suppresses colon cancer progression by directly reducing CCND1 to inactivate the PI3K/AKT pathway

### Supplementary Materials

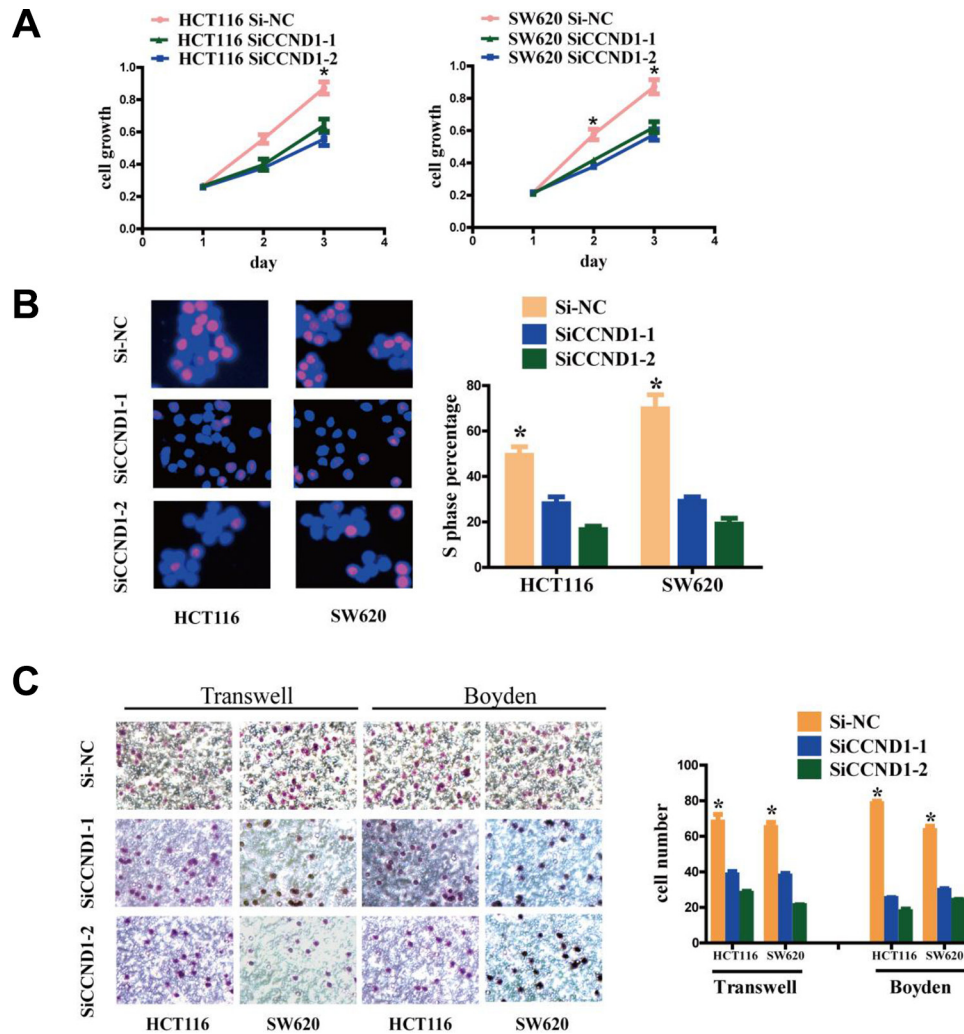

**Supplementary Figure S1: The effect of CCND1 silencing on proliferation, invasion and migration.** (A–C) HCT116 and SW620 cells were transfected with two sequences of si-CCND1. Cell growth and cell cycle were measured by MTT assays (A) and Edu assays (B). Invasion and migration were measured by Transwell and Boyden Chamber assays (C).

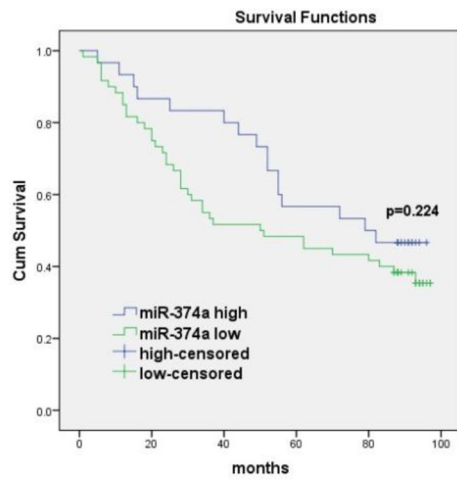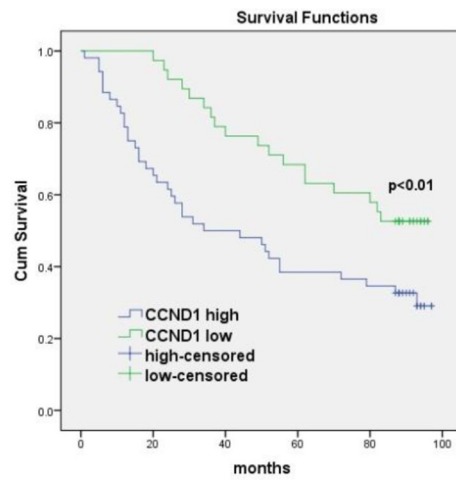

Supplementary Figure S2: Respective survival curve of miR-374a expression (left) and CCND1 expression (right) in CRC tissues.

**Supplementary Table S1: Correlation between the clinical pathological factors and expression of miR-374a in CRC specimens**

| Clinical parameter | <i>n</i> | High expression ( <i>n</i> %) | Low expression ( <i>n</i> %) | $\chi^2$ value | <i>P</i> value |
|--------------------|----------|-------------------------------|------------------------------|----------------|----------------|
| gender             |          |                               |                              |                |                |
| male               | 48       | 17 (35.4)                     | 31 (64.6)                    | 0.201          | 0.654          |
| female             | 42       | 13 (31)                       | 29 (69)                      |                |                |
| age (year)         |          |                               |                              |                |                |
| > 65               | 52       | 18 (34.6)                     | 34 (65.4)                    | 0.091          | 0.763          |
| ≤ 65               | 38       | 12 (31.6)                     | 26 (68.4)                    |                |                |
| T stage            |          |                               |                              |                |                |
| T1–T2              | 15       | 3 (20)                        | 12 (80)                      | 1.44           | 0.23           |
| T3–T4              | 75       | 27 (36)                       | 48 (64)                      |                |                |
| N stage            |          |                               |                              |                |                |
| N <sub>0</sub>     | 58       | 19 (32.8)                     | 39 (67.2)                    | 0.024          | 0.876          |
| N1–N2              | 32       | 11 (34.4)                     | 21 (65.6)                    |                |                |
| Grade              |          |                               |                              |                |                |
| I–II               | 48       | 18 (37.5)                     | 30 (62.5)                    | 0.804          | 0.37           |
| III–IV             | 42       | 12 (28.6)                     | 30 (71.4)                    |                |                |

**Supplementary Table S2: Correlation between the clinical pathological factors and expression of CCND1 in CRC specimens**

| Clinical parameter             | <i>n</i> | High expression ( <i>n</i> %) | Low expression ( <i>n</i> %) | $\chi^2$ value | <i>P</i> value |
|--------------------------------|----------|-------------------------------|------------------------------|----------------|----------------|
| gender                         |          |                               |                              |                |                |
| male                           | 48       | 24 (50)                       | 24 (50)                      | 2.551          | 0.110          |
| female                         | 42       | 28 (66.7)                     | 14 (33.3)                    |                |                |
| age (year)                     |          |                               |                              |                |                |
| > 65                           | 52       | 31 (59.6)                     | 21 (40.4)                    | 0.170          | 0.680          |
| ≤ 65                           | 38       | 21 (55.3)                     | 17 (44.7)                    |                |                |
| T stage                        |          |                               |                              |                |                |
| T <sub>1</sub> –T <sub>2</sub> | 15       | 3 (20)                        | 12 (80)                      | 10.53          | 0.001          |
| T <sub>3</sub> –T <sub>4</sub> | 75       | 49 (65.3)                     | 26 (34.7)                    |                |                |
| N stage                        |          |                               |                              |                |                |
| N <sub>0</sub>                 | 58       | 30 (51.7)                     | 28 (48.3)                    | 2.450          | 0.117          |
| N <sub>1</sub> –N <sub>2</sub> | 32       | 22 (68.8)                     | 10 (31.2)                    |                |                |
| Grade                          |          |                               |                              |                |                |
| I–II                           | 48       | 29 (60.4)                     | 19 (39.6)                    | 0.294          | 0.588          |
| III–IV                         | 42       | 23 (54.8)                     | 19 (45.2)                    |                |                |

**Supplementary Table S3: Sequences of miR-374a and U6**

|          |           | Sequence                   |
|----------|-----------|----------------------------|
| miR-374a | Sense     | 5' CGGCGGTTATAATACAACCTG3' |
|          | Antisense | ----                       |
| U6       | Sense     | 5' CTCGCTTCGGCAGCACATATA3' |
|          | Antisense | ----                       |

**Supplementary Table S4: Primer sequences for CCND1 and ARF5**

|       |           | Sequence                    |
|-------|-----------|-----------------------------|
| CCND1 | Sense     | 5'GACGGCCGAGAAGCTGTGCA 3'   |
|       | Antisense | 5' GCCACCATGGAGGGCGGATT 3'  |
| ARF5  | Sense     | 5' ATCTGTTTCACAGTCTGGGACG3' |
|       | Antisense | 5' CCTGCTTGTTGGCAAATACC3'   |

**Supplementary Table S5: Sequences of miR-374a mimics and negative control, miR-374a inhibitors and inhibitors negative control**

| Gene                        | Sequence  |                             |
|-----------------------------|-----------|-----------------------------|
| miR-374a mimics             | Sense     | 5' UUAUAAUACAACCUGAUAAGUG3' |
|                             | Antisense | 5' CUUAUCAGGUUGUAUUUAAUU3'  |
| Negative control            | Sense     | 5' UUCUCCGAACGUGUCACGUTT3'  |
|                             | Antisense | 5' ACGUGACACGUUCGGAGAATT3'  |
| miR-374a inhibitors         |           | 5' CACUUAUCAGGUUGUAUUUAA3'  |
| Inhibitors negative control |           | 5' CAGUACUUUUGUGUAGUACAA3'  |

**Supplementary Table S6: SiRNA sequences of CCND1**

|         |           | Sequence                       |
|---------|-----------|--------------------------------|
| CCND1-1 | Sense     | 5' UGGAAUAGCUUCUGGAAUU dTdT 3' |
|         | Antisense | 3' dTdA ACCUUAUCGAAGACCUUAA 5' |
| CCND1-2 | Sense     | 5' CAAGCUCAAGUGGAACCUG dTdT 3' |
|         | Antisense | 3'dTdT GUUCGAGUUCACCUUGGAC 5'  |

**Supplementary Table S7: Primer sequences for CCND1 3' UTR**

|              |           | Sequence                            |
|--------------|-----------|-------------------------------------|
| CCND1 3' UTR | Sense     | 5' ATCGCTCGAGACAAAGGAGGCGTCTCGG 3'  |
|              | Antisense | 5' ATCGCGCCGCTAGGAGTGGGACAGGTGGC 3' |
